# Supplementary material for: Delving into the bandgap tuning and nonlinear optical properties of hydrothermally synthesized pristine and boron doped molybdenum trioxide nanorods
Source: Royal Society of Chemistry journal article supplement (doi:10.1039/d4tc03081h), 2024-01-01
Supplement: d4tc03081h1.pdf [file d4tc03081h1.pdf]

# A Delve into Bandgap Tuning and Nonlinear Optical Properties of Hydrothermally Synthesized Pristine and Boron Doped Molybdenum trioxide Nanorods

Anjali G<sup>1,2</sup>, Mallikarjun Anandalli<sup>2</sup>, Kala M S<sup>1,\*</sup>, Nandakumar Kalarikkal<sup>2,3,4,\*</sup>

<sup>1</sup> Department of Physics, St. Teresa's College, Ernakulam, Kerala-682011, India

<sup>2</sup>International and Inter University Centre for Nanoscience and Nanotechnology, Mahatma Gandhi University, Kottayam, Kerala-686560, India

<sup>3</sup>School of Pure and Applied Physics, Mahatma Gandhi University, Kottayam, Kerala-686560, India

<sup>4</sup>International Centre for Ultrafast Studies, Mahatma Gandhi University, Kottayam, Kerala-686560, India

## Supplementary information

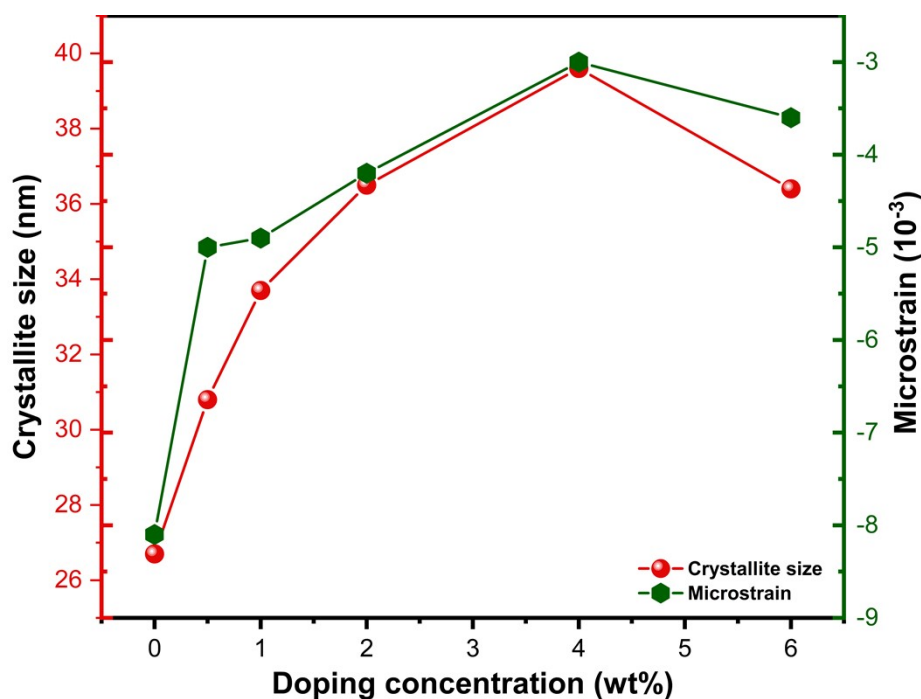

**Figure S 1:** Correlation graph of crystallite size and microstrain with doping concentration of boron

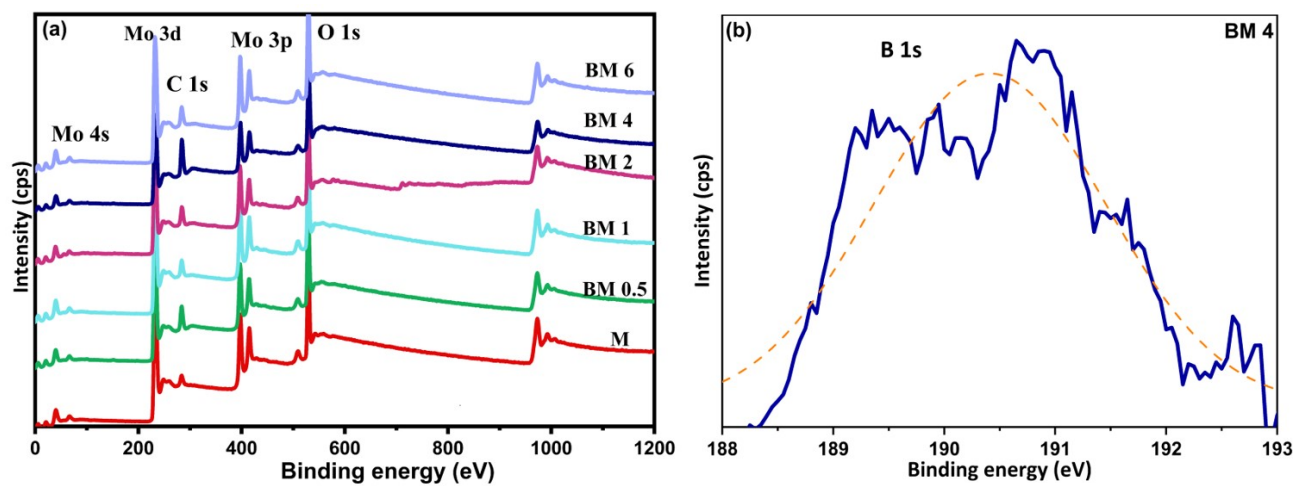

**Figure S 2:** (a) Full range XPS survey of  $\text{MoO}_3$  and B- $\text{MoO}_3$  samples (b) B 1s spectra of BM 4 sample

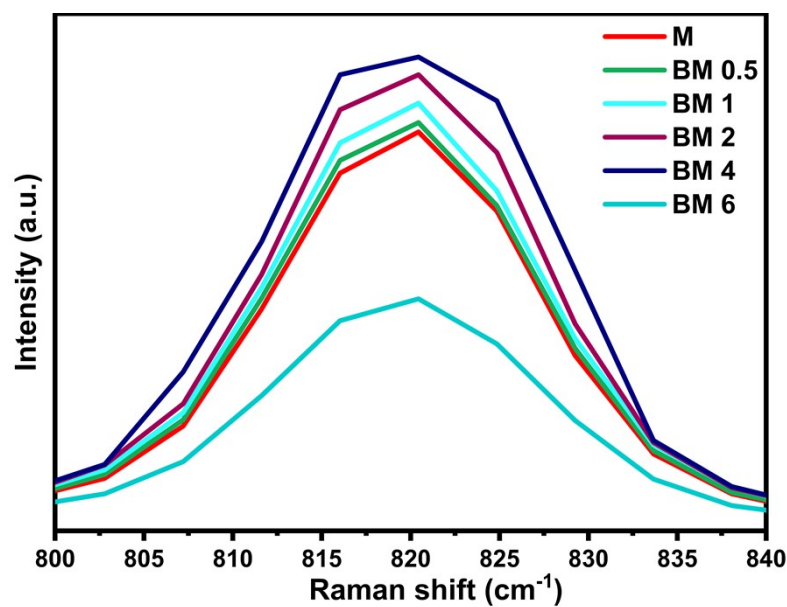

**Figure S 3:** Raman spectra peak corresponding to vibrational mode at  $818\text{cm}^{-1}$  of pristine and doped  $\text{MoO}_3$  (for finding the phonon profile)

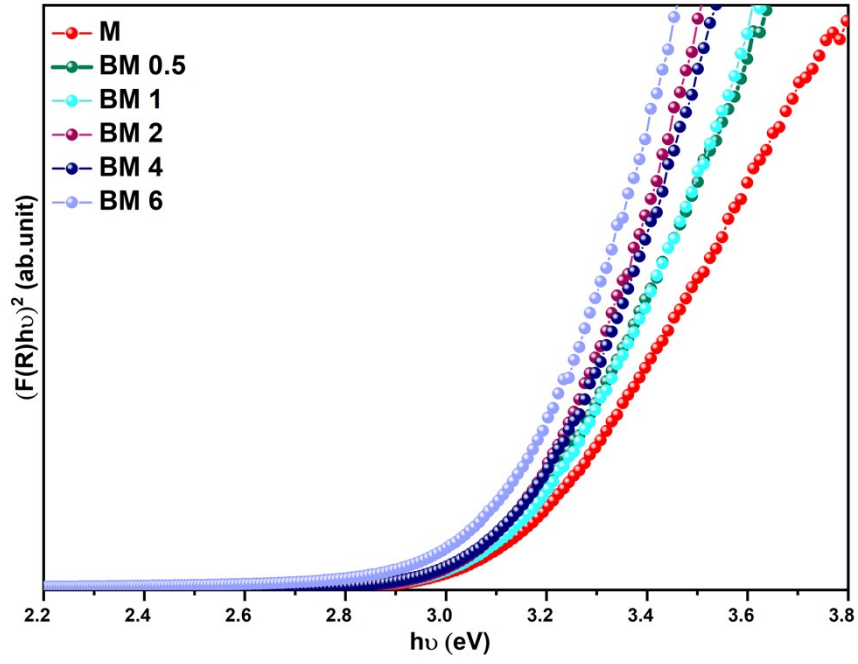

**Figure S 4:** Kubelka-Munck plot for finding the direct band gap of  $\text{MoO}_3$  and B- $\text{MoO}_3$

**Table S 1:** Color coordinate parameters of the samples from the CIE diagram

| Samples | Color Coordinates |        | Dominant wavelength (nm) | Color purity |
|---------|-------------------|--------|--------------------------|--------------|
|         | x                 | y      |                          |              |
| M       | 0.1620            | 0.0582 | 459.9                    | 90.6 %       |
| BM 0.5  | 0.1617            | 0.0562 | 459.5                    | 91 %         |
| BM 1    | 0.1659            | 0.0605 | 458.7                    | 89.3 %       |
| BM 2    | 0.1710            | 0.0652 | 457.7                    | 87.3 %       |
| BM 4    | 0.1856            | 0.0602 | 448.5                    | 84.3 %       |
| BM 6    | 0.1604            | 0.0674 | 462.9                    | 89.1 %       |

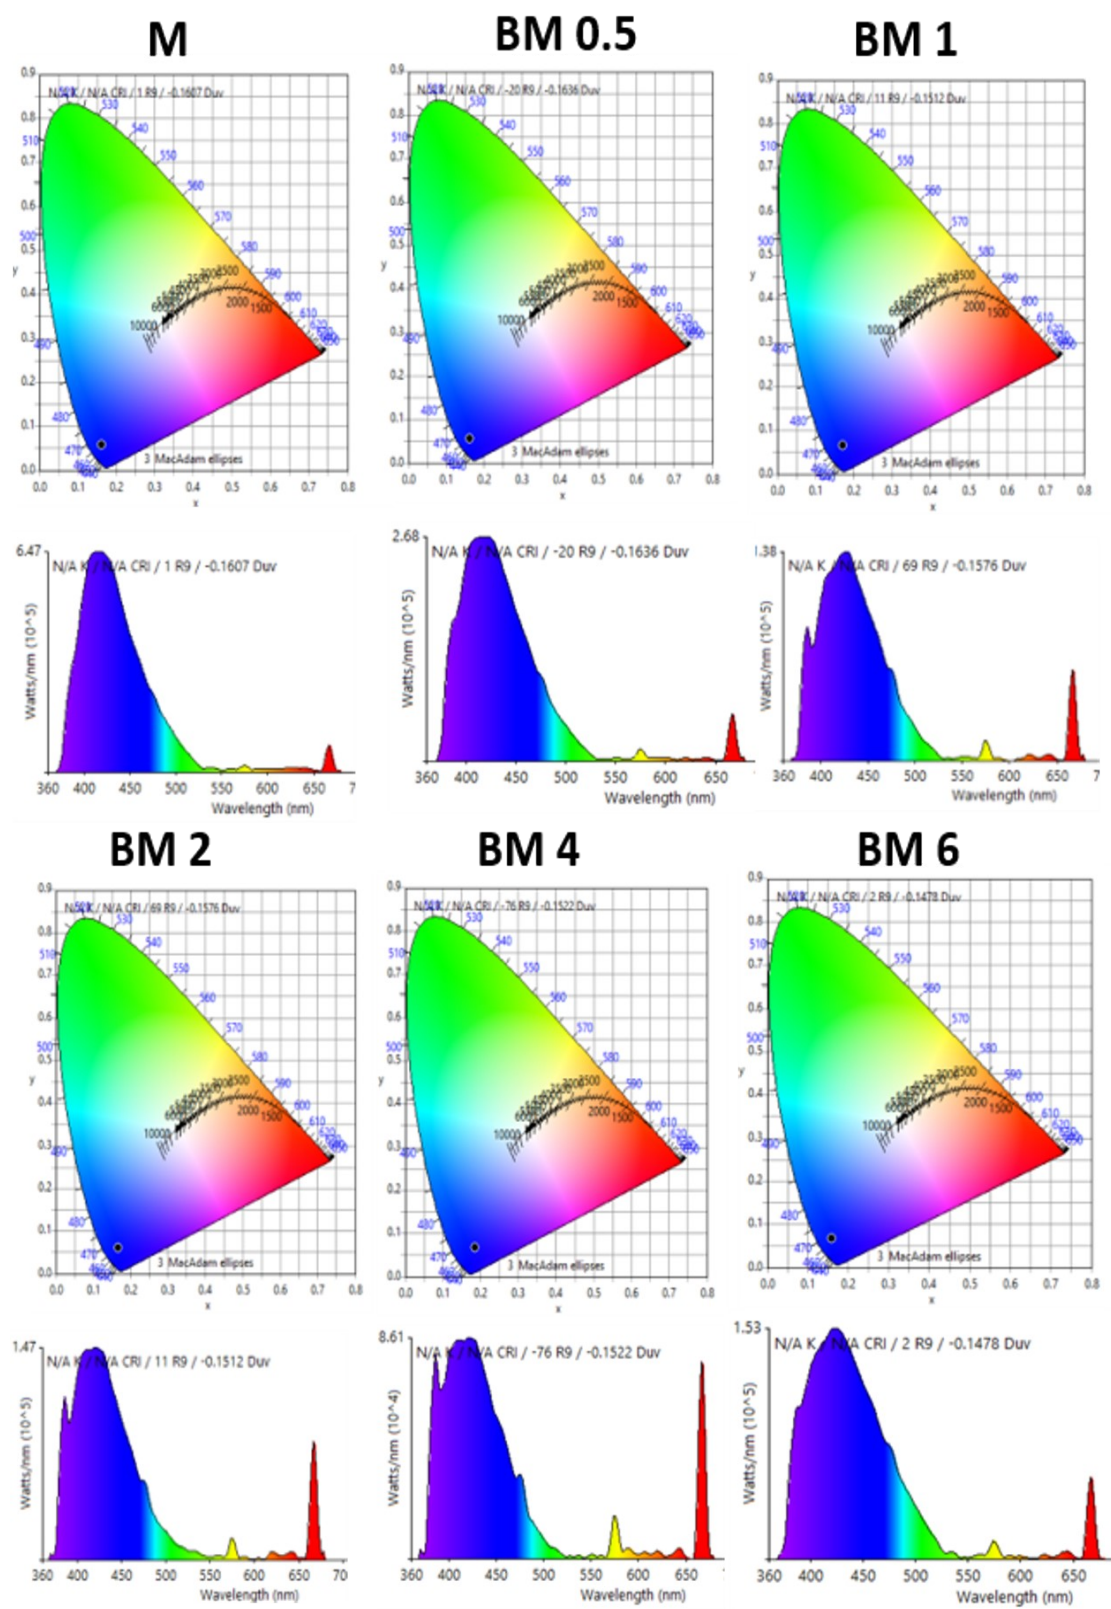

**Figure S 5:** CIE diagram and spectral irradiance curve of MoO<sub>3</sub> and B-MoO<sub>3</sub> samples

## Time Resolved Fluorescence Study

The PL life time ( $\tau$ ) of the sample can be defined as the time at which intensity emission reaches  $1/e$  and the fluorescence decay curve can be fitted using tri-exponential kinetics equation.

$$F(t) = A + B_1 \exp(-t/\tau_1) + B_2 \exp(-t/\tau_2) + B_3 \exp(-t/\tau_3)$$

The fitted parameters and average life time were given in Table S 2.

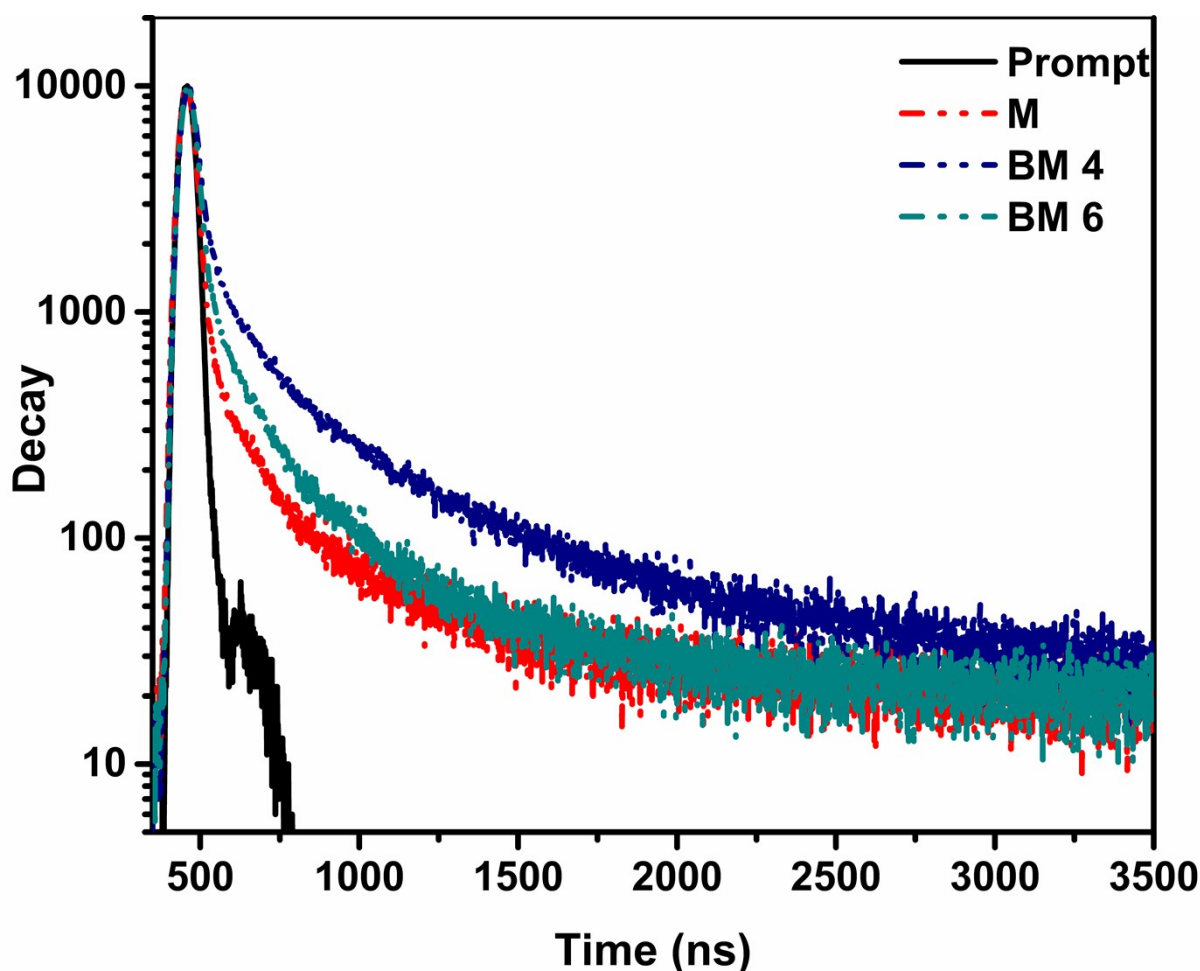

**Figure S 6:** Decay curve of MoO<sub>3</sub> and B-MoO<sub>3</sub> (BM 4 and BM 6) from time-resolved fluorescence study

All the samples show the mono-exponential decay curve with an average lifetime in the range of 1.8 -11. The BM 4 sample has greater life time over other samples. As explained in the

photoluminescence part, the increase in doping concentration can introduce defect levels that can act as trapping centers for charge carriers by preventing recombination. This results in an increase in the lifetime of charge carriers at excited levels. This, in turn, can enhance the sequential two-photon absorption in doped samples.

**Table S 2:** Fitting parameters of fluorescence decay curves performed by time-resolved fluorescence spectroscopy technique

| Sample | T1(ns) | T2(ns) | T3(ns) | B1                    | B2                    | B3                    | $\tau_{ave}$ (ns) |
|--------|--------|--------|--------|-----------------------|-----------------------|-----------------------|-------------------|
| M      | 2.47   | 0.23   | 13.6   | $1.73 \times 10^{-3}$ | 0.121                 | $2.61 \times 10^{-4}$ | 1.8               |
| BM 4   | 4.64   | 17.4   | 1.07   | 858.61                | 352.14                | 625.81                | 11                |
| BM 6   | 2.79   | 12.1   | 0.27   | $2.82 \times 10^{-3}$ | $4.37 \times 10^{-4}$ | 0.102                 | 2                 |

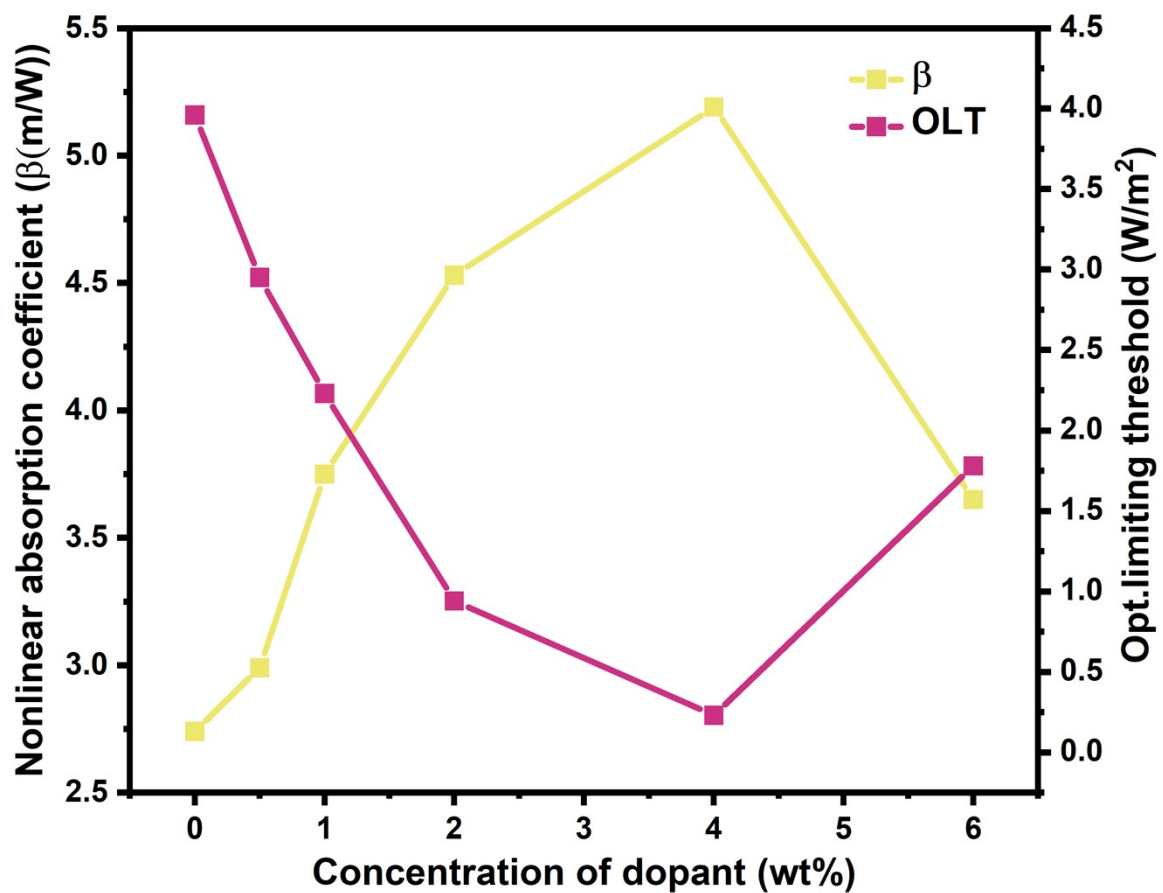

**Figure S 7:** Correlation graph of nonlinear absorption coefficient and optical limiting threshold value with concentration of boron doping
